# Supplementary material for: Instability and Subpopulation Dynamics of Azole Trailing Phenotypes in Clinical Candida tropicalis Isolates
Source: Research Square preprint supplement (doi:10.21203/rs.3.rs-8484141/v1), 2026-01-23

**Instability and Subpopulation Dynamics of Azole Trailing Phenotypes in Clinical Candida tropicalis Isolates**

Snigdha Reddy1, Saikat Paul1,2, Shivaprakash M Rudramurthy1, Harsimran Kaur1, Anup K Ghosh1*

1Department of Medical Microbiology, Postgraduate Institute of Medical Education and Research (PGIMER), Chandigarh, 160012, India.

2Department of Clinical Pharmacy and Translational Science, University of Tennessee Health Science Center, Memphis, TN, USA.

* Corresponding author.

Correspondence: Dr. Anup K Ghosh

Professor

Department of Medical Microbiology,

Postgraduate Institute of Medical Education and Research (PGIMER),

Chandigarh 160012, India.

Email: anupkg3@gmail.com

Tel.: +91 172 2755156.

Fax: +91 172 2744401.

**Table S1** AFST profile of *C. tropicalis* exhibiting trailing growth against azoles: MIC values marked in blue/ red exhibit trailing phenomenon to the particular azole, while the ones in black are susceptible to that azole without any trailing. The ones marked in red indicate trailing to all the tested azoles.

| Isolate Code | Fluconazole MIC (µg/ml) | Voriconazole MIC (µg/ml) | Itraconazole MIC (µg/ml) | Posaconazole MIC (µg/ml) | Isavuconazole MIC(µg/ml) |
| --- | --- | --- | --- | --- | --- |
| Tr1 | 1 | 0.12 | 0.25 | 0.25 | 0.12 |
| Tr2 | 1 | 0.12 | 0.25 | 0.25 | 0.12 |
| Tr3 | 0.12 | 0.03 | 0.03 | 0.03 | 0.03 |
| Tr4 | 0.12 | 0.03 | 0.03 | 0.03 | 0.03 |
| Tr5 | 0.12 | 0.03 | 0.03 | 0.03 | 0.03 |
| Tr6 | 2 | 0.12 | 0.25 | 0.5 | 0.06 |
| Tr7 | 0.5 | 0.03 | 0.12 | 0.12 | 0.03 |
| Tr8 | 2 | 0.25 | 0.06 | 0.12 | 0.03 |
| Tr9 | 0.5 | 0.12 | 0.06 | 0.06 | 0.12 |
| Tr10 | 0.12 | 0.03 | 0.06 | 0.03 | 0.03 |
| Tr11 | 0.25 | 0.03 | 0.03 | 0.03 | 0.03 |
| Tr12 | 0.12 | 0.03 | 0.06 | 0.03 | 0.03 |
| Tr13 | 0.12 | 0.03 | 0.06 | 0.03 | 0.03 |
| Tr14 | 0.5 | 0.12 | 0.06 | 0.06 | 0.03 |
| Tr15 | 0.12 | 0.03 | 0.06 | 0.03 | 0.03 |
| Tr16 | 0.12 | 0.03 | 0.03 | 0.03 | 0.03 |
| Tr17 | 0.5 | 0.03 | 0.06 | 0.03 | 0.03 |
| Tr18 | 0.12 | 0.03 | 0.03 | 0.03 | 0.03 |
| Tr19 | 0.12 | 0.03 | 0.03 | 0.03 | 0.03 |
| Tr20 | 0.12 | 0.03 | 0.03 | 0.03 | 0.03 |
| Tr21 | 0.25 | 0.03 | 0.06 | 0.03 | 0.03 |
| Tr22 | 0.5 | 1 | 0.12 | 0.06 | 0.03 |
| Tr23 | 0.12 | 0.03 | 0.06 | 0.03 | 0.03 |
| Tr 24 | 0.25 | 0.03 | 0.25 | 0.03 | 0.03 |
| Tr 25 | 0.25 | 0.03 | 0.12 | 0.03 | 0.03 |
| Tr 26 | 0.5 | 0.06 | 0.06 | 0.06 | 0.06 |
| Tr 27 | 0.12 | 0.06 | 0.06 | 0.06 | 0.03 |
| Tr 28 | 0.12 | 0.03 | 0.03 | 0.03 | 0.03 |
| Tr29 | 0.12 | 0.03 | 0.03 | 0.03 | 0.03 |
| Tr30 | 0.12 | 0.03 | 0.06 | 0.06 | 0.03 |
| Tr31 | 0.12 | 0.03 | 0.03 | 0.03 | 0.03 |
| Tr32 | 0.12 | 0.03 | 0.03 | 0.03 | 0.03 |
| Tr33 | 0.25 | 0.03 | 0.03 | 0.03 | 0.03 |
| Tr34 | 0.5 | 0.06 | 0.03 | 0.06 | 0.03 |
| Tr35 | 0.12 | 0.06 | 0.06 | 0.06 | 0.06 |
| Tr36 | 0.25 | 0.03 | 0.06 | 0.03 | 0.03 |
| Tr37 | 0.5 | 0.12 | 0.25 | 0.06 | 0.06 |
| Tr38 | 0.25 | 0.06 | 0.03 | 0.03 | 0.03 |
| Tr39 | 0.12 | 0.12 | 0.06 | 0.03 | 0.03 |
| Tr40 | 0.5 | 0.12 | 0.06 | 0.03 | 0.03 |
| Tr41 | 0.25 | 0.03 | 0.06 | 0.06 | 0.06 |
| Tr42 | 0.5 | 0.06 | 0.03 | 0.03 | 0.03 |
| Tr43 | 0.12 | 0.12 | 0.06 | 0.06 | 0.06 |
| Tr44 | 0.5 | 0.06 | 0.06 | 0.03 | 0.03 |
| Tr45 | 0.5 | 0.06 | 0.06 | 0.06 | 0.06 |
| Tr46 | 0.12 | 0.06 | 0.06 | 0.06 | 0.03 |
| Tr47 | 0.12 | 0.03 | 0.03 | 0.03 | 0.03 |
| Tr48 | 0.12 | 0.03 | 0.03 | 0.03 | 0.03 |
| Tr49 | 0.12 | 0.03 | 0.06 | 0.06 | 0.03 |
| Tr50 | 0.12 | 0.03 | 0.03 | 0.03 | 0.03 |
| Tr51 | 0.12 | 0.03 | 0.03 | 0.03 | 0.03 |
| Tr52 | 0.25 | 0.03 | 0.03 | 0.03 | 0.03 |
| Tr53 | 0.5 | 0.06 | 0.03 | 0.06 | 0.03 |
| Tr54 | 0.12 | 0.06 | 0.06 | 0.06 | 0.06 |
| Tr55 | 0.25 | 0.03 | 0.06 | 0.03 | 0.03 |
| Tr56 | 0.5 | 0.12 | 0.25 | 0.06 | 0.06 |
| Tr57 | 0.25 | 0.06 | 0.03 | 0.03 | 0.03 |
| Tr58 | 0.12 | 0.12 | 0.06 | 0.03 | 0.03 |

**Table S2** Zone diameter in millimetres for Fluconazole and Voriconazole.

| Isolate ID | Fluconazole 25 µg | Fluconazole 50 µg | Fluconazole 100 µg | Voriconazole 1 µg | Voriconazole 2 µg | Voriconazole 4 µg |
| --- | --- | --- | --- | --- | --- | --- |
| Tr1 | 25 | 27 | 31 | 17 | 22 | 29 |
| Tr2 | 20 | 22 | 28 | 16 | 22 | 28 |
| Tr3 | 24 | 27 | 31 | 21 | 24 | 30 |
| Tr4 | 26 | 27 | 33 | 21 | 27 | 32 |
| Tr5 | 29 | 31 | 34 | 24 | 27 | 31 |
| Tr6 | 15 | 24 | 25 | 20 | 22 | 29 |
| Tr7 | 14 | 15 | 16 | 20 | 21 | 26 |
| Tr8 | 15 | 21 | 24 | 25 | 26 | 28 |
| Tr9 | 15 | 15 | 17 | 21 | 22 | 26 |
| Tr10 | 24 | 24 | 26 | 20 | 28 | 29 |

**Table S3** Vials labelled from 1-12 representing the month of revival (1-12). Cells shaded in blue represent trailing positive, while the stricken cells represent loss of trailing for that particular month.

| Isolate | Flu trailing | Trailing positivity after every revival | | | | | | | | | | | |
| --- | --- | --- | --- | --- | --- | --- | --- | --- | --- | --- | --- | --- | --- |
| Code | MIC (µg/ml) | 1 | 2 | 3 | 4 | 5 | 6 | 7 | 8 | 9 | 10 | 11 | 12 |
| Tr25 | 0.25 |  | | | | | | | | | | | |
| Tr26 | 0.25 |  | | | | | | | | | | | |
| Tr27 | 0.5 |  | | | | | | | | | | | |
| Tr28 | 0.12 |  | | | | | | |  | | | | |
| Tr29 | 0.12 |  | | | | | | | | | | | |
| Tr30 | 0.12 |  | | | | | | | | | | | |
| Tr31 | 0.12 |  | | | | | | | | | | | |
| Tr32 | 0.12 |  | | | | | | |  | | | | |
| Tr33 | 0.12 |  | | | | | | | | | | | |
| Tr34 | 0.25 |  | | | | | | |  | | | | |
| Tr35 | 0.5 |  | | | | | | | | | | | |
| Tr36 | 0.12 |  | | | | | | | | | |  | |
| Tr37 | 0.25 |  | | | | | | | | | |  | |
| Tr38 | 0.5 |  | | | | | | | | | |  | |

**Table S4A** Effect of pH on *C. albicans* trailing growth.

|  | **CA** | **CA** | **CA** | **CA** | **CA** | **CA** | **CA** | **CA** | **CA** | **CA** | **CA** | **CA** | **CA** | **CA** | **CA** | **CA** |
| --- | --- | --- | --- | --- | --- | --- | --- | --- | --- | --- | --- | --- | --- | --- | --- | --- |
| pH | 27343 | 29117 | 28920 | 28752 | 28753 | 35183 | 35815 | P3399 | P72 | P4521 | R5602 | 47253 | 48864 | 46764 | 443864 | P1099 |
| pH 3 & 4 | | | | | | | | | | | | | | | | |
| 5 | 2 | 2 | 0.12 | 0.12 | 0.25 | 0.12 | 0.12 | 0.12 | 1 | 0.12 | 0.12 | 0.12 | 0.12 | 0.5 | 0.12 | 0.12 |
| 5.5 | 2 | 2 | 0.12 | 0.12 | 0.25 | 0.12 | 0.12 | 0.12 | 1 | 0.12 | 0.12 | 0.12 | 0.12 | 0.5 | 0.12 | 0.12 |
| 6 | 2 | 2 | 0.12 | 0.12 | 0.25 | 0.12 | 0.12 | 0.12 | 1 | 0.12 | 0.12 | 0.12 | 0.12 | 0.5 | 0.12 | 0.12 |
| 6.5 | 2 | 2 | 0.12 | 0.12 | 0.25 | 0.12 | 0.12 | 0.12 | 1 | 0.12 | 0.12 | 0.12 | 0.12 | 0.5 | 0.12 | 0.12 |
| 7 | 2 | 2 | 0.12 | 0.12 | 0.25 | 0.12 | 0.12 | 0.12 | 1 | 0.12 | 0.12 | 0.12 | 0.12 | 0.5 | 0.12 | 0.12 |
| 7.5 | 2 | 2 | 0.12 | 0.12 | 0.25 | 0.12 | 0.12 | 0.12 | 1 | 0.12 | 0.12 | 0.12 | 0.12 | 0.5 | 0.12 | 0.12 |
| 8 | 2 | 2 | 0.12 | 0.12 | 0.25 | 0.12 | 0.12 | 0.12 | 1 | 0.12 | 0.12 | 0.12 | 0.12 | 0.5 | 0.12 | 0.12 |
| 8.5 | 2 | 2 | 0.12 | 0.12 | 0.25 | 0.12 | 0.12 | 0.12 | 1 | 0.12 | 0.12 | 0.12 | 0.12 | 0.5 | 0.12 | 0.12 |
| 9 | 2 | 2 | 0.12 | 0.12 | 0.25 | 0.12 | 0.12 | 0.12 | 1 | 0.12 | 0.12 | 0.12 | 0.12 | 0.5 | 0.12 | 0.12 |
| pH 10 & 11 |  |  |  |  |  |  |  |  |  |  |  |  |  |  |  |  |

Red cells indicate the presence of trailing growth, while uncolored (white) cells indicate its absence at the corresponding pH. CA: *C. albicans*

**Table S4B** Effect of pH on *C. albicans* and other *Candida* specie

|  | **CA** | **CA** | **CA** | **CA** | **CA** | **CA** | **CA** | **CG** | **CG** | **CG** | **CP** | **CP** | **CV** | **CV** |
| --- | --- | --- | --- | --- | --- | --- | --- | --- | --- | --- | --- | --- | --- | --- |
| pH | 321 | KMC210 | 48568 | 504052 | 543522 | 543179 | 543557 | P2605 | 47138 | P2043 | G282 | 427459 | P1741 | 21598 |
| pH 3 & 4 | | | | | | | | | | | | | | |
| 5 | 0.5 | 0.25 | 0.12 | 0.25 | 0.12 | 0.12 | 0.12 | 4 | 0.12 | 1 | 2 | 1 | 1 | 0.25 |
| 5.5 | 0.5 | 0.25 | 0.12 | 0.25 | 0.12 | 0.12 | 0.12 | 4 | 0.12 | 1 | 2 | 1 | 1 | 0.25 |
| 6 | 0.5 | 0.25 | 0.12 | 0.25 | 0.12 | 0.12 | 0.12 | 4 | 0.12 | 1 | 2 | 1 | 1 | 0.25 |
| 6.5 | 0.5 | 0.25 | 0.12 | 0.25 | 0.12 | 0.12 | 0.12 | 4 | 0.12 | 1 | 2 | 1 | 1 | 0.25 |
| 7 | 0.5 | 0.25 | 0.12 | 0.25 | 0.12 | 0.12 | 0.12 | 4 | 0.12 | 1 | 2 | 1 | 1 | 0.25 |
| 7.5 | 0.5 | 0.25 | 0.12 | 0.25 | 0.12 | 0.12 | 0.12 | 4 | 0.12 | 1 | 2 | 1 | 1 | 0.25 |
| 8 | 0.5 | 0.25 | 0.12 | 0.25 | 0.12 | 0.12 | 0.12 | 4 | 0.12 | 1 | 2 | 1 | 1 | 0.25 |
| 8.5 | 0.5 | 0.25 | 0.12 | 0.25 | 0.12 | 0.12 | 0.12 | 4 | 0.12 | 1 | 2 | 1 | 1 | 0.25 |
| 9 | 0.5 | 0.25 | 0.12 | 0.25 | 0.12 | 0.12 | 0.12 | 4 | 0.12 | 1 | 2 | 1 | 1 | 0.25 |
| pH 10 & 11 |  |  |  |  |  |  |  |  |  |  |  |  |  |  |

Red (*C. albicans*), olive green (*C. glabrata*), aqua (*C. parapsilosis*) and orange (C. viswanathii ) cells indicate the presence of trailing growth, while uncolored (white) cells indicate its absence at the corresponding pH. CA: *C. albicans*;CG: *C. glabrata;* CP: *C. parapsilosis;* CV:C. viswanathii

**Fig. S1** PAP assay of the remaining trailing isolates


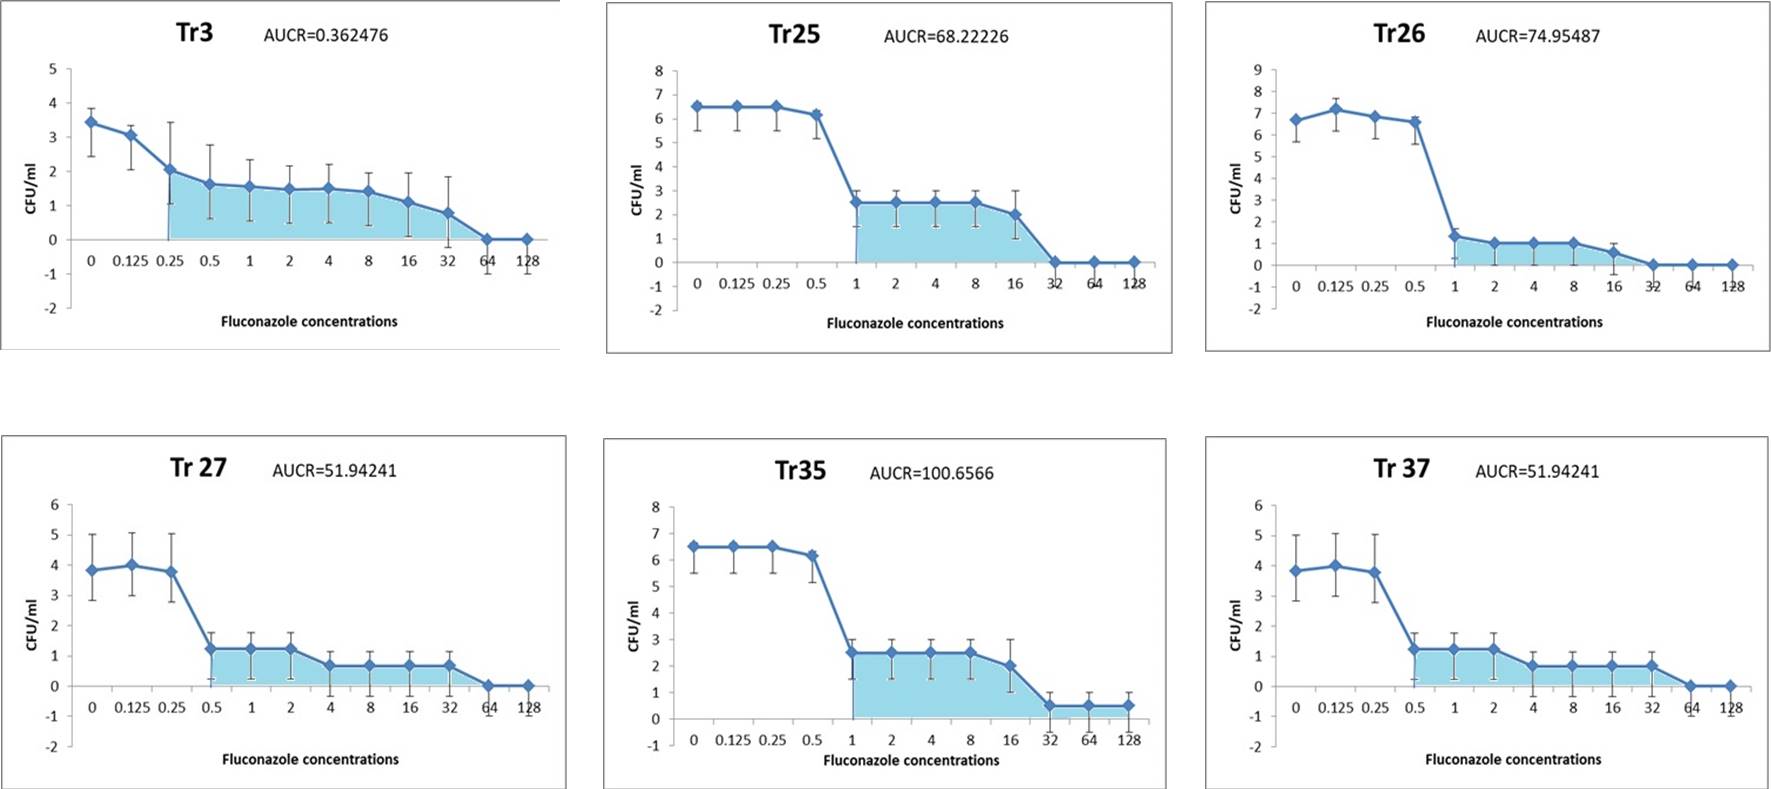

Supplement: Supplementary file 1 [file ee1cfe3bbe8fc7392a9fc55f.docx]
